# Supplementary material for: Exploring the Hypocholesterolemic Potential of a Fucus vesiculosus Extract: Omic Insights into Molecular Mechanisms at the Intestinal Level
Source: MDPI journal article supplement (doi:10.3390/md22040187), 2024-04-20
Supplement: s1 [file s1]

Table S1- List of genes identified in control cells

| Genes identified in control cells |             |
|-----------------------------------|-------------|
| DBNL                              | PGAM1;PGAM4 |
| DECR1                             | SLC7A7      |
| VPS35                             | MTHFD1      |
| LMO7                              | EWSR1       |
| PGAM5                             | VAPB        |
| PRKRA                             | RPL7        |
| DSP                               | CBX3        |
| DPYSL2                            | EHD1        |
| RPS5                              | LSR         |
| ATP6V1B2                          | RBM7        |
| AMBP                              | RPL11       |
| SLC25A6;SLC25A4                   | KATNAL2     |
| BLMH                              | RPL8        |
| VPS26A                            | PLRG1       |
| KRT1                              | PNO1        |
| API5                              | COLGALT1    |
| OCLN                              | TMEM192     |
| GNAS                              | TXN         |
| PTPRF                             | TXNL1       |
| MRPL19                            | SFN         |
| HIST1H1E                          | HIST1H1D    |
| LMBRD1                            | LMNA        |
| PRPF19                            | PEG10       |
| RPA2                              | DSG1        |
| FABP5                             | RSL1D1      |
| EMD                               | PSME2       |
| QPRT                              | RPL6        |
| HSD17B11                          | ENOPH1      |
| RPL18A                            | HIST1H4A    |
| XRN2                              | BCL2L13     |
| TBL1XR1                           | NUP50       |
| SND1                              | ADRM1       |
| RBM47                             | NARS        |
| IGFBP7                            | RPS16       |
| SRPRB                             | HNRNPH3     |
| RPL18                             | PSMC1       |
| STAU1                             | CLN3        |
| RPS8                              | PAK2        |
| CRYGS                             | EEF1G       |
| ENSG00000268083                   | H1F0        |
| ACAD11                            | S100A9      |
| TOP1                              | PARP1       |

Table S2- List of genes identified in cells exposed to the extract

| Genes identified in control cells |                    |                 |
|-----------------------------------|--------------------|-----------------|
| DLG1                              | EZR                | SNX2            |
| PPP2CA;PPP2CB                     | AGT                | IGHA2           |
| PGM2                              | ERAP1              | ADD1            |
| QARS                              | CD81               | COL4A3BP        |
| SIGIRR                            | MCM2               | IPO5            |
| ESYT1                             | DBN1               | HMGCS1          |
| ATP6V0D1                          | MCM4               | GLOD4           |
| SLC23A1                           | OSBP               | ATP6V1D         |
| NUCKS1                            | HTATSF1            | GBA             |
| BDH1                              | EPB41L1            | CEACAM1         |
| CTNBNB1                           | SLC29A1            | CTNNA2          |
| YWHAG                             | AHNAK              | EPS15L1         |
| CD276                             | DKFZp566H1924;NPTN | GALNS           |
| KDELC2                            | TRMT6              | ITGA2           |
| SUSD2                             | ESYT2              | MFI2            |
| NSF                               | CAPN5              | NRD1            |
| GNAI2                             | ALYREF             | CASK            |
| LGMN                              | RDH14              | CPPED1          |
| SNX27                             | LUC7L3             | NPEPPS;NPEPPSL1 |
| KPNA2                             | TMEM87A            | FBXO2           |
| SLC35F6                           | ASPH               | TRIP10          |
| SMARCD2                           | STS                | NPC1            |
| NUP93                             | RDX                | ADA             |
| SLC7A5                            | FBLN1              | MAL2            |
| NAE1                              | MYOF               | STX4            |
| FABP1                             | HAAO               | PVRL2           |
| HNRNPF                            | PLS1               | APP             |
| GALNT6                            | FKBP10             | ANXA11          |
| TMX3                              | CALR               | FAM49B          |
| NUP160                            | PCNA               | HLA-A           |
| ERBB3                             | PDPR               | PVR             |
| CEACAM5                           | PRKAR1A            | SLC26A6         |
| COQ9                              | LCP1               | SUCLG1          |
| SLC38A3                           | DPP7               | OAT             |
| ALDH16A1                          | MPZL1              | HIST1H2BN       |
| CLU                               | SERINC1            |                 |
| CD63                              | HDAC1              |                 |
| IPO7                              | NUP133             |                 |
| SNRPA                             | MUC13              |                 |
| APLP2                             | ITGA6              |                 |
| HMGCL                             | DHTKD1             |                 |
| TMEM87B                           | FLNB               |                 |
